# Supplementary material for: Facile synthesis of MoS2 quantum dots as fluorescent probes for sensing of hydroquinone and bioimaging
Source: Royal Society of Chemistry journal article supplement (doi:10.1039/c9ay00988d), 2019-01-01
Supplement: c9ay00988d1.pdf [file c9ay00988d1.pdf]

## Supporting information

### **Facile Synthesis of MoS<sub>2</sub> Quantum Dots as Fluorescent Probes for Sensing of Hydroquinone and Bioimaging**

Lu Li,<sup>a</sup> Zhihua Guo,<sup>a</sup> Shengxu Wang,<sup>a</sup> Daowei Li,<sup>b</sup> Xianfeng Hou,<sup>a</sup> Fangting Wang,<sup>a</sup>

Yizhou Yang<sup>a</sup>, Xudong Yang,<sup>\*a</sup>

<sup>a</sup> School of Chemical Engineering, Advanced Institute of Materials Science, Changchun University of Technology, Changchun 130012, P. R. China.

<sup>b</sup> School of Stomatology, Jilin University, Changchun 130041, P. R. China

\*Corresponding author:

Tel: +86-431-85716328; Fax: +86-431-85716328; E-mail: yangxudong10@163.com; yangxudong@ccut.edu.cn.

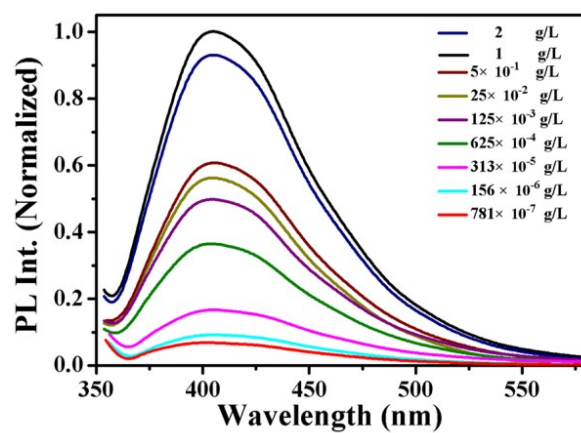

**Figure. S1** The PL spectra of MoS<sub>2</sub> QDs aqueous solution with different concentrations.

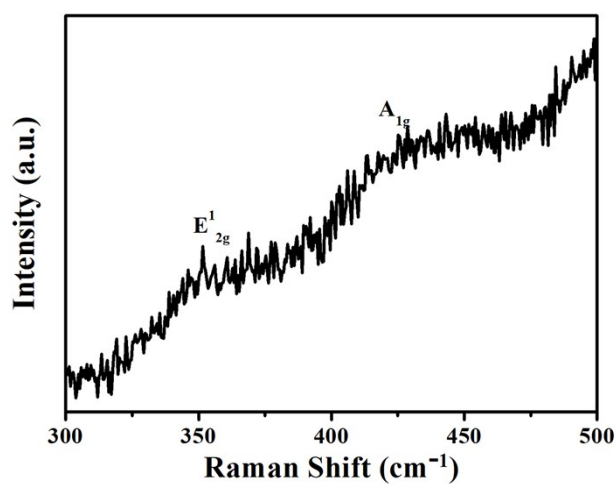

**Figure S2.** Raman spectrum of as prepared MoS<sub>2</sub> QDs

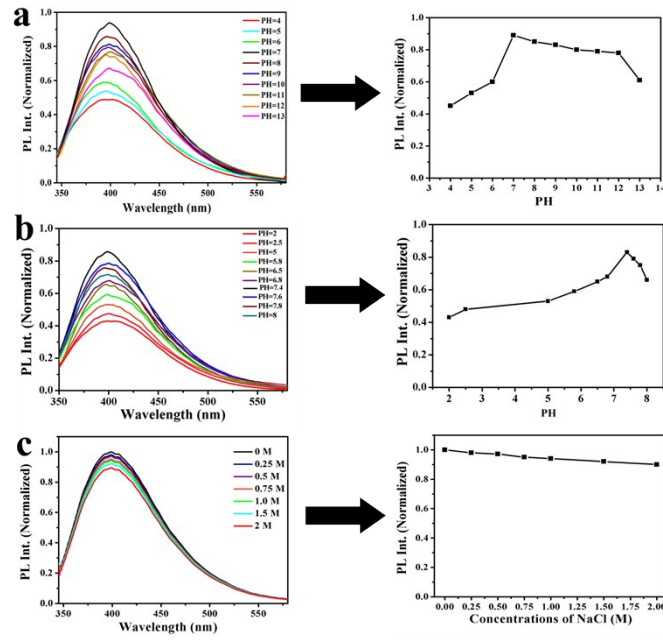

**Figure S3.** a) Effect of pH on fluorescent intensity of MoS<sub>2</sub> QDs in the aqueous, b) Effect of pH on fluorescent intensity of MoS<sub>2</sub> QDs in the PBS buffer solution aqueous, c) ion stability of MoS<sub>2</sub> QDs with different concentrations of NaCl in range of 0 ~ 2M.

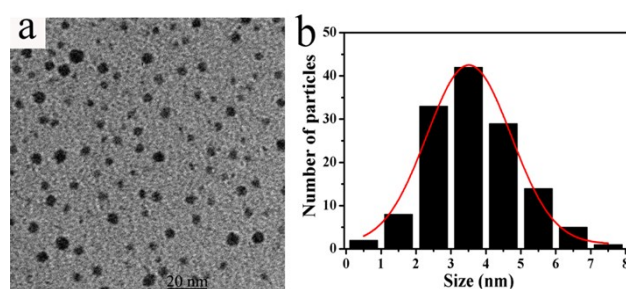

**Figure S4.** a) TEM image of MoS<sub>2</sub> QDs with the addition of H<sub>2</sub>Q (3 μM), scale bar: 20 nm. b) the corresponding particle size distribution histograms.

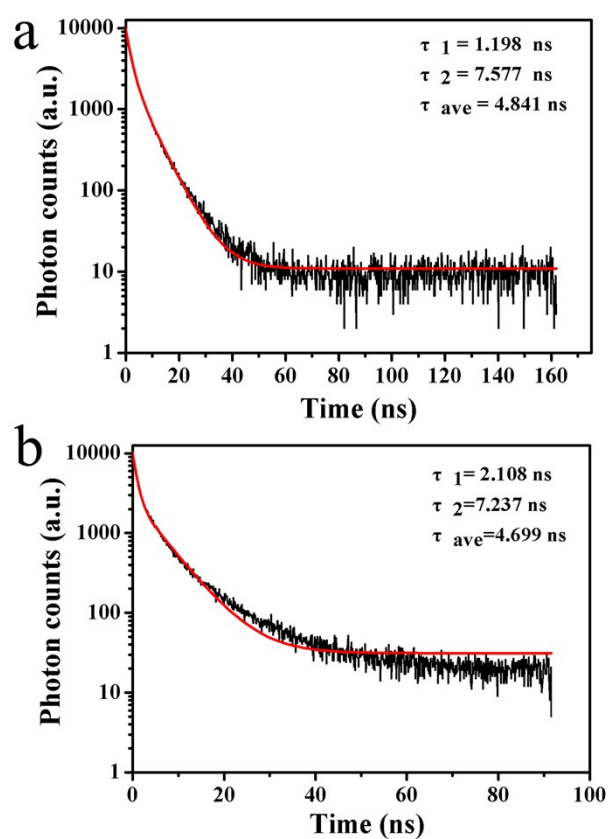

**Figure S5.** a) The fluorescence decay curve of the MoS<sub>2</sub> QDs in the absence of H<sub>2</sub>Q, b) the fluorescence decay curve of the MoS<sub>2</sub> QDs in the presence of H<sub>2</sub>Q (3 μM).

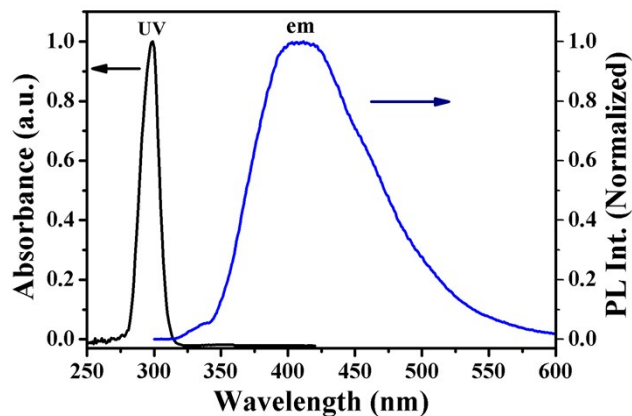

**Figure S6.** UV-vis spectrum of H<sub>2</sub>Q and PL emission spectrum of MoS<sub>2</sub> QDs.

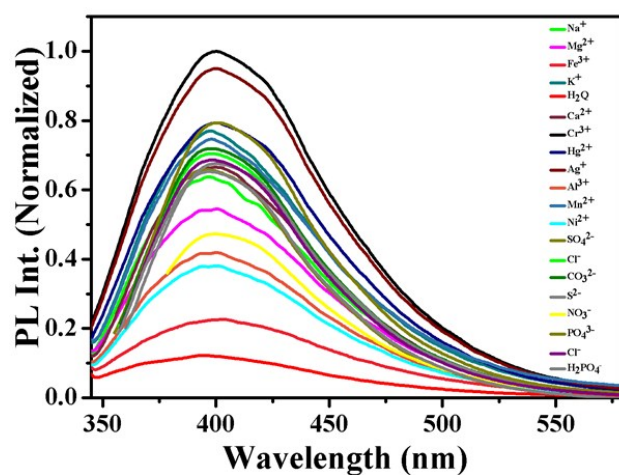

**Figure S7.** Normalized PL emission spectra of the hydroquinone in the presence of different ions (Cr<sup>3+</sup>, Ag<sup>+</sup>, Hg<sup>2+</sup>, K<sup>+</sup>, Mn<sup>2+</sup>, Ca<sup>2+</sup>, Na<sup>+</sup>, Mg<sup>2+</sup>, Al<sup>3+</sup>, Ni<sup>2+</sup>, Fe<sup>3+</sup>, NO<sub>3</sub><sup>-</sup>, SO<sub>4</sub><sup>2-</sup>, CO<sub>3</sub><sup>2-</sup>, Br<sup>-</sup>, S<sup>2-</sup>, PO<sub>4</sub><sup>3-</sup>, Cl<sup>-</sup> and H<sub>2</sub>PO<sub>4</sub><sup>-</sup>) in aqueous solution at the same concentration of 100  $\mu$ M.
